# Supplementary material for: Psychological Burden during the COVID-19 Pandemic in Female Caregivers of Preterm versus Term Born Children
Source: MDPI journal article supplement (doi:10.3390/children10050787), 2023-04-27
Supplement: s1 [file s1]

**Supplementary Materials:** The following supporting information can be downloaded at: <https://www.mdpi.com/article/10.3390/children10050787/s1>,

Assessment of child protection behavior:

The following 11 items were asked to assess child protection behavior.

**Table S1.** Corrected item-scale correction values of the scale and changes in Cronbach's Alpha.

| Scale PB                                                                                       | Corrected Item-Scale Correlation | Changes in Chronbach's Alpha due Item Exclusion |
|------------------------------------------------------------------------------------------------|----------------------------------|-------------------------------------------------|
| 1. I was worried of my child's health because of COVID-19.                                     | 0.455                            | 0.703                                           |
| 2. I washed the hands of my child more often and disinfected contact surfaces more frequently. | 0.474                            | 0.700                                           |
| 3. My child wore a breathing mask.                                                             | 0.267                            | 0.733                                           |
| 4. I thought more about the nutrition of my child.                                             | 0.445                            | 0.706                                           |
| 5. I gave my child dietary supplements.                                                        | 0.323                            | 0.721                                           |
| 6. My child got alternative medication.                                                        | 0.291                            | 0.725                                           |
| 7. My child went to school by private vehicles.                                                | 0.399                            | 0.711                                           |
| 8. I missed social and familiar support because of COVID-19.                                   | 0.321                            | 0.723                                           |
| 9. I was worried to take my child to therapies like physiotherapy, ergotherapy or others.      | 0.535                            | 0.691                                           |
| 10. My child took part in less therapies because of COVID-19.                                  | 0.456                            | 0.703                                           |
| 11. I was worried of too less therapies for my child.                                          | 0.241                            | 0.733                                           |

Note. N = 2382. Scale Cronbach's alpha = 0.733. A 7-point Likert scale was used for each item (ranging from "1 = strongly disagree" to "7 = strongly agree").

**Table S2.** Results of descriptive subgroup analysis—prevalence of generalized anxiety symptoms, depression symptoms, COVID-19-anxiety and child protection behavior.

|                        |       | Medium                      | Cut-Off Values [%] |
|------------------------|-------|-----------------------------|--------------------|
| Female caregiver's age | 18–24 | Generalized anxiety (GAD-7) | 6.7                |
|                        |       |                             | GAD $\geq 5$ 39.5  |
|                        |       |                             | GAD $\geq 10$ 16.1 |
|                        |       |                             | GAD $\geq 15$ 8.1  |
|                        |       | Depression (PHQ-2)          | 2.2                |
|                        |       | PB                          | 29.3               |
|                        |       | C-19-A.                     | 19.5               |
|                        |       |                             | PHQ $\geq 3$ 33.9  |
|                        | 25–34 | Generalized anxiety (GAD-7) | 6.5                |
|                        |       |                             | GAD $\geq 5$ 34.5  |
|                        |       |                             | GAD $\geq 10$ 14.7 |
|                        |       |                             | GAD $\geq 15$ 8.6  |
|                        |       | Depression (PHQ-2)          | 1.9                |
|                        |       | PB                          | 30.4               |
|                        |       | C-19-A.                     | 18.6               |
|                        |       |                             | PHQ $\geq 3$ 27.5  |
|                        | 35–44 | Generalized anxiety (GAD-7) | 6.7                |
|                        |       |                             | GAD $\geq 5$ 33.8  |
|                        |       |                             | GAD $\geq 10$ 15   |
|                        |       |                             | GAD $\geq 15$ 9.6  |
|                        |       | Depression (PHQ-2)          | 1.7                |
|                        |       | PB                          | 31.8               |
|                        |       | C-19-A.                     | 19.1               |
|                        |       |                             | PHQ $\geq 3$ 22    |

|                |               |                             |      |                                                             |
|----------------|---------------|-----------------------------|------|-------------------------------------------------------------|
| Marital status | 45–54         | Generalized anxiety (GAD-7) | 8.1  | GAD $\geq 5$ 31<br>GAD $\geq 10$ 22.4<br>GAD $\geq 15$ 13.8 |
|                |               | Depression (PHQ-2)          | 1.9  | PHQ $\geq 3$ 25.9                                           |
|                |               | PB                          | 32.7 |                                                             |
|                |               | C-19-A.                     | 20.9 |                                                             |
|                |               | Generalized anxiety (GAD-7) | 6.6  | GAD $\geq 5$ 32.3<br>GAD $\geq 10$ 13.1                     |
|                |               | Depression (PHQ-2)          | 1.9  | GAD $\geq 15$ 10.9                                          |
|                |               | PB                          | 31.1 | PHQ $\geq 3$ 28.4                                           |
|                | Single        | C-19-A.                     | 18.5 |                                                             |
|                |               | Generalized anxiety (GAD-7) | 6.5  | GAD $\geq 5$ 34.4<br>GAD $\geq 10$ 15.5                     |
|                |               | Depression (PHQ-2)          | 1.8  | GAD $\geq 15$ 8.5                                           |
|                | Married       | PB                          | 30.7 | PHQ $\geq 3$ 24.9                                           |
|                |               | C-19-A.                     | 18.9 |                                                             |
|                |               | Generalized anxiety (GAD-7) | 6.4  | GAD $\geq 5$ 37.6<br>GAD $\geq 10$ 12.7                     |
|                |               | Depression (PHQ-2)          | 2.0  | GAD $\geq 15$ 8.6                                           |
|                |               | PB                          | 30.6 | PHQ $\geq 3$ 30.3                                           |
|                | Relation-ship | C-19-A.                     | 18.5 |                                                             |
|                |               | Generalized anxiety (GAD-7) | 8.3  | GAD $\geq 5$ 21.5<br>GAD $\geq 10$ 23.1                     |
|                |               | Depression (PHQ-2)          | 2.0  | GAD $\geq 15$ 16.9                                          |
|                | Divorced      | PB                          | 33.6 | PHQ $\geq 3$ 29.2                                           |
|                |               | C-19-A.                     | 19.7 |                                                             |
|                |               | Generalized anxiety (GAD-7) | 10.3 | GAD $\geq 5$ 33.3<br>GAD $\geq 10$ 66.7                     |
|                |               | Depression (PHQ-2)          | 1.3  | GAD $\geq 15$ 0.0                                           |
|                |               | PB                          | 44.0 | PHQ $\geq 3$ 0.0                                            |
|                | Widowed       | C-19-A.                     | 21.7 |                                                             |
|                |               | Generalized anxiety (GAD-7) | 6.6  | GAD $\geq 5$ 34.6<br>GAD $\geq 10$ 15.0                     |
|                |               | Depression (PHQ-2)          | 1.8  | GAD $\geq 15$ 9.0                                           |
| Family Role    | Mother        | PB                          | 30.8 | PHQ $\geq 3$ 26.4                                           |
|                |               | C-19-A.                     | 18.9 |                                                             |
|                |               | Generalized anxiety         | 4.4  | GAD $\geq 5$ 0.0                                            |
|                | Foster mother | Generalized anxiety         | 4.4  | GAD $\geq 5$ 0.0                                            |
|                |               | Generalized anxiety         | 4.4  | GAD $\geq 5$ 0.0                                            |

|                                           |                                         |                             |      |                    |
|-------------------------------------------|-----------------------------------------|-----------------------------|------|--------------------|
| Education level                           | University                              | (GAD-7)                     |      | GAD $\geq 10$ 20.0 |
|                                           |                                         |                             |      | GAD $\geq 15$ 0.0  |
|                                           |                                         | Depression (PHQ-2)          | 1.6  | PHQ $\geq 3$ 20.0  |
|                                           |                                         | PB                          | 33.6 |                    |
|                                           |                                         | C-19-A.                     | 16.2 |                    |
|                                           |                                         | Generalized anxiety (GAD-7) | 6.0  | GAD $\geq 5$ 35.1  |
|                                           | Higher education entrance qualification |                             |      | GAD $\geq 10$ 13.3 |
|                                           |                                         |                             |      | GAD $\geq 15$ 6.4  |
|                                           |                                         | Depression (PHQ-2)          | 1.6  | PHQ $\geq 3$ 21.4  |
|                                           |                                         | PB                          | 30.1 |                    |
|                                           |                                         | C-19-A.                     | 18.3 |                    |
|                                           |                                         | Generalized anxiety (GAD-7) | 6.7  | GAD $\geq 5$ 34.7  |
|                                           | Secondary education                     |                             |      | GAD $\geq 10$ 14.3 |
|                                           |                                         |                             |      | GAD $\geq 15$ 10.2 |
|                                           |                                         | Depression (PHQ-2)          | 1.9  | PHQ $\geq 3$ 26.9  |
|                                           |                                         | PB                          | 30.6 |                    |
|                                           |                                         | C-19-A.                     | 18.9 |                    |
|                                           |                                         | Generalized anxiety (GAD-7) | 6.9  | GAD $\geq 5$ 34.1  |
| Previously diagnosed psychiatric disorder | Lower secondary education               |                             |      | GAD $\geq 10$ 17.8 |
|                                           |                                         |                             |      | GAD $\geq 15$ 9.6  |
|                                           |                                         | Depression (PHQ-2)          | 2.0  | PHQ $\geq 3$ 30.8  |
|                                           |                                         | PB                          | 31.6 |                    |
|                                           |                                         | C-19-A.                     | 19.3 |                    |
|                                           |                                         | Generalized anxiety (GAD-7) | 7.3  | GAD $\geq 5$ 27.7  |
|                                           | No qualification                        |                             |      | GAD $\geq 10$ 15.8 |
|                                           |                                         |                             |      | GAD $\geq 15$ 14.8 |
|                                           |                                         | Depression (PHQ-2)          | 2.0  | PHQ $\geq 3$ 29.6  |
|                                           |                                         | PB                          | 32.4 |                    |
|                                           |                                         | C-19-A.                     | 19.7 |                    |
|                                           |                                         | Generalized anxiety (GAD-7) | 9.2  | GAD $\geq 5$ 80.0  |
| Previously diagnosed psychiatric disorder | Yes                                     |                             |      | GAD $\geq 10$ 0.0  |
|                                           |                                         |                             |      | GAD $\geq 15$ 20.0 |
|                                           |                                         | Depression (PHQ-2)          | 3.2  | PHQ $\geq 3$ 40.0  |
|                                           |                                         | PB                          | 28.0 |                    |
|                                           |                                         | C-19-A.                     | 20.0 |                    |
|                                           |                                         | Generalized anxiety (GAD-7) | 10.6 | GAD $\geq 5$ 34.9  |
|                                           | No                                      |                             |      | GAD $\geq 10$ 14.2 |
|                                           |                                         |                             |      | GAD $\geq 15$ 7.4  |
|                                           |                                         | Depression (PHQ-2)          | 3.0  | PHQ $\geq 3$ 24.4  |
|                                           |                                         | PB                          | 32.1 |                    |
|                                           |                                         | C-19-A.                     | 21.4 |                    |
|                                           |                                         | Generalized anxiety         | 6.3  | GAD $\geq 5$ 29.5  |

|                      |                |                             |      |                                                                                    |
|----------------------|----------------|-----------------------------|------|------------------------------------------------------------------------------------|
| City size population |                | (GAD-7)                     |      | GAD $\geq 10$ 24.8<br>GAD $\geq 15$ 29.5<br>PHQ $\geq 3$ 50.9                      |
|                      |                | Depression (PHQ-2)          | 1.7  |                                                                                    |
|                      |                | PB                          | 30.7 |                                                                                    |
|                      |                | C-19-A.                     | 18.6 |                                                                                    |
|                      | $\geq 100,000$ | Generalized anxiety (GAD-7) | 6.7  | GAD $\geq 5$ 32.9<br>GAD $\geq 10$ 15.2<br>GAD $\geq 15$ 10.0<br>PHQ $\geq 3$ 25.4 |
|                      |                | Depression (PHQ-2)          | 1.8  |                                                                                    |
|                      |                | PB                          | 30.7 |                                                                                    |
|                      |                | C-19-A.                     | 18.8 |                                                                                    |
|                      | $\geq 20,000$  | Generalized anxiety (GAD-7) | 6.7  | GAD $\geq 5$ 35.5<br>GAD $\geq 10$ 15.8<br>GAD $\geq 15$ 9.2<br>PHQ $\geq 3$ 28.7  |
|                      |                | Depression (PHQ-2)          | 1.9  |                                                                                    |
|                      |                | PB                          | 30.7 |                                                                                    |
|                      |                | C-19-A.                     | 18.9 |                                                                                    |
|                      | $\geq 5000$    | Generalized anxiety (GAD-7) | 6.4  | GAD $\geq 5$ 34.9<br>GAD $\geq 10$ 15.6<br>GAD $\geq 15$ 7.3<br>PHQ $\geq 3$ 24.4  |
|                      |                | Depression (PHQ-2)          | 1.8  |                                                                                    |
|                      |                | PB                          | 30.6 |                                                                                    |
|                      |                | C-19-A.                     | 18.9 |                                                                                    |
|                      | <5000          | Generalized anxiety (GAD-7) | 6.4  | GAD $\geq 5$ 35.2<br>GAD $\geq 10$ 13.8<br>GAD $\geq 15$ 8.6<br>PHQ $\geq 3$ 26.4  |
|                      |                | Depression (PHQ-2)          | 1.8  |                                                                                    |
|                      |                | PB                          | 31.1 |                                                                                    |
|                      |                | C-19-A.                     | 18.7 |                                                                                    |
| Occupation           | Employed       | Generalized anxiety (GAD-7) | 6.5  | GAD $\geq 5$ 34.9<br>GAD $\geq 10$ 14.7<br>GAD $\geq 15$ 8.4<br>PHQ $\geq 3$ 24.4  |
|                      |                | Depression (PHQ-2)          | 1.8  |                                                                                    |
|                      |                | PB                          | 30.9 |                                                                                    |
|                      |                | C-19-A.                     | 18.7 |                                                                                    |
|                      | Not employed   | Generalized anxiety (GAD-7) | 7.0  | GAD $\geq 5$ 33.2<br>GAD $\geq 10$ 16.3<br>GAD $\geq 15$ 10.9<br>PHQ $\geq 3$ 32.8 |
|                      |                | Depression (PHQ-2)          | 2.1  |                                                                                    |
| Child's age          | 0–3            | PB                          | 30.5 |                                                                                    |
|                      |                | C-19-A.                     | 19.5 |                                                                                    |
|                      |                | Generalized anxiety (GAD-7) | 6.2  | GAD $\geq 5$ 35.1<br>GAD $\geq 10$ 13.4<br>GAD $\geq 15$ 7.6                       |
|                      |                |                             |      |                                                                                    |
|                      |                |                             |      |                                                                                    |

|                                     |                 |                             |      |                                                               |
|-------------------------------------|-----------------|-----------------------------|------|---------------------------------------------------------------|
| Gestational age of preterm children | 4–6             | Depression (PHQ-2)          | 1.8  | PHQ $\geq 3$ 24.9                                             |
|                                     |                 | PB                          | 30.1 |                                                               |
|                                     |                 | C-19-A.                     | 18.6 |                                                               |
|                                     | 7–10            | Generalized anxiety (GAD-7) | 7.7  | GAD $\geq 5$ 34.5<br>GAD $\geq 10$ 19.3<br>GAD $\geq 15$ 12.4 |
|                                     |                 | Depression (PHQ-2)          | 2.1  | PHQ $\geq 3$ 32.6                                             |
|                                     |                 | PB                          | 32.4 |                                                               |
|                                     | 11–17           | C-19-A.                     | 19.6 |                                                               |
|                                     |                 | Generalized anxiety (GAD-7) | 7.4  | GAD $\geq 5$ 32.1<br>GAD $\geq 10$ 21.0<br>GAD $\geq 15$ 11.1 |
|                                     |                 | Depression (PHQ-2)          | 1.8  | PHQ $\geq 3$ 25.8                                             |
|                                     | 32–36 weeks     | PB                          | 32.9 |                                                               |
|                                     |                 | C-19-A.                     | 19.2 |                                                               |
|                                     |                 | Generalized anxiety (GAD-7) | 6.6  | GAD $\geq 5$ 33.9<br>GAD $\geq 10$ 13.7<br>GAD $\geq 15$ 10.1 |
|                                     | 28–32 weeks     | Depression (PHQ-2)          | 1.8  | PHQ $\geq 3$ 21.7                                             |
|                                     |                 | PB                          | 31.1 |                                                               |
|                                     |                 | C-19-A.                     | 19.0 |                                                               |
|                                     | $\leq 28$ weeks | Generalized anxiety (GAD-7) | 6.4  | GAD $\geq 5$ 32.3<br>GAD $\geq 10$ 15.1<br>GAD $\geq 15$ 9.2  |
|                                     |                 | Depression (PHQ-2)          | 1.7  | PHQ $\geq 3$ 24.9                                             |
|                                     |                 | PB                          | 32.6 |                                                               |
| Child's disease: BPD                | Yes             | C-19-A.                     | 18.8 |                                                               |
|                                     |                 | Generalized anxiety (GAD-7) | 6.0  | GAD $\geq 5$ 29.2<br>GAD $\geq 10$ 13.5<br>GAD $\geq 15$ 9.0  |
|                                     |                 | Depression (PHQ-2)          | 1.4  | PHQ $\geq 3$ 18.0                                             |
|                                     | No              | PB                          | 32.1 |                                                               |
|                                     |                 | C-19-A.                     | 18.5 |                                                               |
|                                     |                 | Generalized anxiety (GAD-7) | 6.9  | GAD $\geq 5$ 27.3<br>GAD $\geq 10$ 20.0<br>GAD $\geq 15$ 10.9 |

|           |     |                             |      |                                                               |
|-----------|-----|-----------------------------|------|---------------------------------------------------------------|
| Asthma    | No  | Depression (PHQ-2)          | 1.6  | PHQ $\geq$ 3 21.8                                             |
|           |     | PB                          | 35.2 |                                                               |
|           |     | C-19-A.                     | 19.9 |                                                               |
|           |     | Generalized anxiety (GAD-7) | 6.4  | GAD $\geq$ 5 33.3<br>GAD $\geq$ 10 13.4<br>GAD $\geq$ 15 9.6  |
|           |     | Depression (PHQ-2)          | 1.7  | PHQ $\geq$ 3 22.1                                             |
|           |     | PB                          | 31.3 |                                                               |
|           |     | C-19-A.                     | 18.7 |                                                               |
|           | Yes | Generalized anxiety (GAD-7) | 8.4  | GAD $\geq$ 5 28.4<br>GAD $\geq$ 10 17.6<br>GAD $\geq$ 15 21.6 |
|           |     | Depression (PHQ-2)          | 2.3  | PHQ $\geq$ 3 40.5                                             |
|           |     | PB                          | 34.0 |                                                               |
|           |     | C-19-A.                     | 21.2 |                                                               |
|           |     | Generalized anxiety (GAD-7) | 6.5  | GAD $\geq$ 5 34.7<br>GAD $\geq$ 10 14.9<br>GAD $\geq$ 15 8.6  |
|           |     | Depression (PHQ-2)          | 1.8  | PHQ $\geq$ 3 25.9                                             |
| Operation | No  | PB                          | 30.7 |                                                               |
|           |     | C-19-A.                     | 18.8 |                                                               |
|           |     | Generalized anxiety (GAD-7) | 6.8  | GAD $\geq$ 5 35.9<br>GAD $\geq$ 10 16.8<br>GAD $\geq$ 15 9.9  |
|           |     | Depression (PHQ-2)          | 1.7  | PHQ $\geq$ 3 24.4                                             |
|           |     | PB                          | 33.1 |                                                               |
|           |     | C-19-A.                     | 19.3 |                                                               |
|           | Yes | Generalized anxiety (GAD-7) | 6.6  | GAD $\geq$ 5 34.4<br>GAD $\geq$ 10 15.0<br>GAD $\geq$ 15 8.9  |
|           |     | Depression (PHQ-2)          | 1.8  | PHQ $\geq$ 3 26.4                                             |
|           |     | PB                          | 30.7 |                                                               |
|           |     | C-19-A.                     | 18.8 |                                                               |

GAD-7 = generalized anxiety disorder-7, PHQ-2 = patient health questionnaire-2, PB = child protection behavior, C-19-A = COVID-19 anxiety questionnaire.
